# Supplementary material for: Reversible charge-polarity control for a photo-triggered anti-ambipolar In2Se3&WSe2 heterotransistor
Source: Royal Society of Chemistry journal article supplement (doi:10.1039/d3nr01474f), 2023-01-01
Supplement: d3nr01474f1.pdf [file d3nr01474f1.pdf]

## Electronic Supplementary Information (ESI)

### Reversible charge-polarity control for photo-triggered anti-ambipolar $\text{In}_2\text{Se}_3/\text{WSe}_2$ heterotransistor

Shan Huang,<sup>a,b</sup> Hongyu Chen,<sup>a,b\*</sup> Sujuan Wang,<sup>a,b</sup> Yang Chen,<sup>a,b</sup> Jianfeng He,<sup>c</sup> Wenhai Wang,<sup>a,b</sup> Yuan Pan,<sup>a,b</sup> Yunpeng Zhao,<sup>a,b</sup> Ligan Qi<sup>a,b</sup> and Shichen Su<sup>a,b,d\*</sup>

- a. Institute of Semiconductor Science and Technology, South China Normal University, Foshan, 528225, P. R. China  
E-mail: chenhy@m.scnu.edu.cn, shichensu@scnu.edu.cn
- b. Guangdong Provincial Key Laboratory of Chip and Integration Technology, Guangzhou 510631, P. R. China Address here.
- c. Department of Electronic Engineering, The Chinese University of Hong Kong, Hong Kong, 999077, P. R. China
- d. Guangdong Engineering Research Center of Optoelectronic Functional Materials and Devices, Guangzhou 510631, P. R. China

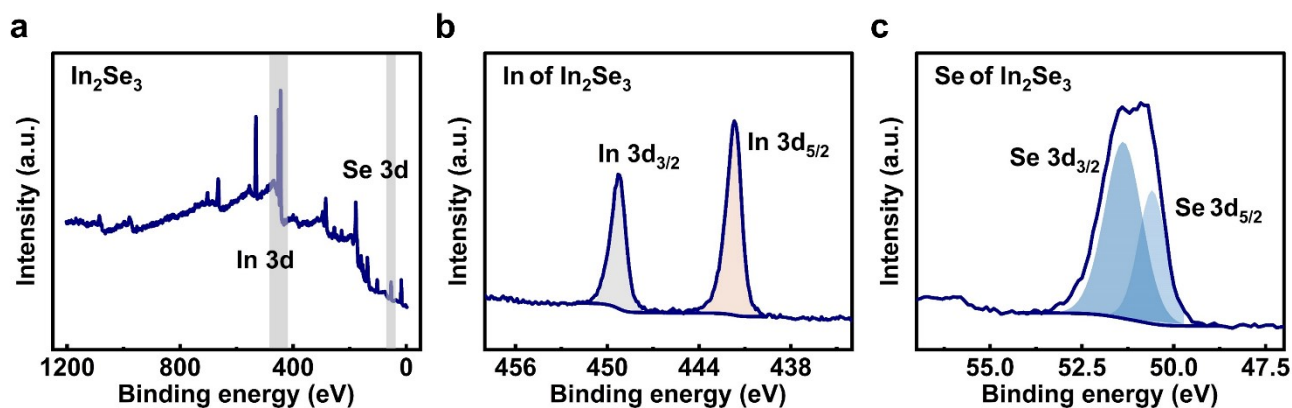

Fig. S1 (a) XPS survey spectra of  $\text{In}_2\text{Se}_3$  microwire. (b) The fitted In 3d XPS spectrum from  $\text{In}_2\text{Se}_3$  microwire. (c) The fitted Se 3d XPS spectrum from  $\text{In}_2\text{Se}_3$  microwire.

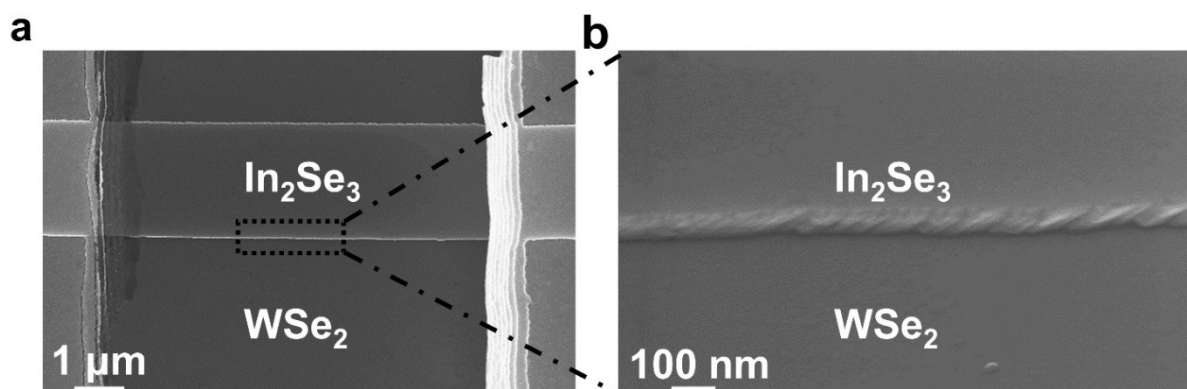

Fig. S2 SEM images of a representative  $\text{In}_2\text{Se}_3/\text{WSe}_2$  heterotransistor. (a) Scale bar is 1  $\mu\text{m}$ . (b) Scale bar is 100 nm.

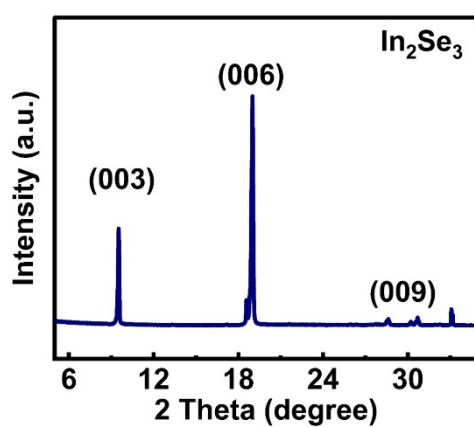

Fig. S3 XRD patterns of  $\text{In}_2\text{Se}_3$  microwire.

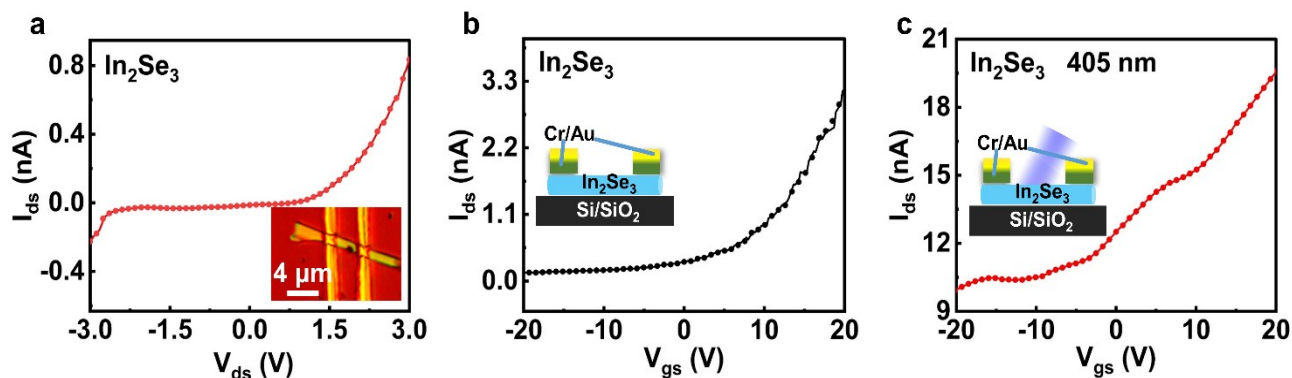

**Fig. S4** (a)  $I$ - $V$  characteristic curve of  $\text{In}_2\text{Se}_3$  device under the dark condition. Inset: OM image of  $\text{In}_2\text{Se}_3$  device. (b) Transfer characteristic of  $\text{In}_2\text{Se}_3$  device under the dark condition at  $V_{ds} = 3$  V. Inset: Schematic structure of  $\text{In}_2\text{Se}_3$  device. (c) Transfer characteristic of  $\text{In}_2\text{Se}_3$  device under 405 nm laser illumination ( $15.9 \text{ mW cm}^{-2}$ ) at  $V_{ds} = 3$  V. Inset: Schematic structure of  $\text{In}_2\text{Se}_3$  device under laser illumination.

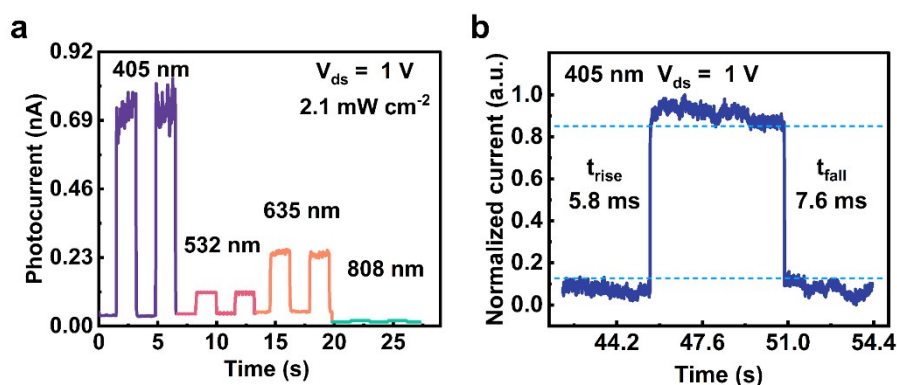

**Fig. S5** (a) Photoresponse of  $\text{In}_2\text{Se}_3$ & $\text{WSe}_2$  heterotransistor under different illumination wavelengths of 405 nm, 532 nm, 635 nm, and 808 nm ( $2.1 \text{ mW cm}^{-2}$ ) at  $V_{ds} = 1$  V. (b) One cycle of the photoresponse of  $\text{In}_2\text{Se}_3$ & $\text{WSe}_2$  heterotransistor under 405 nm laser illumination at 1 V for estimating both the rise and fall times.

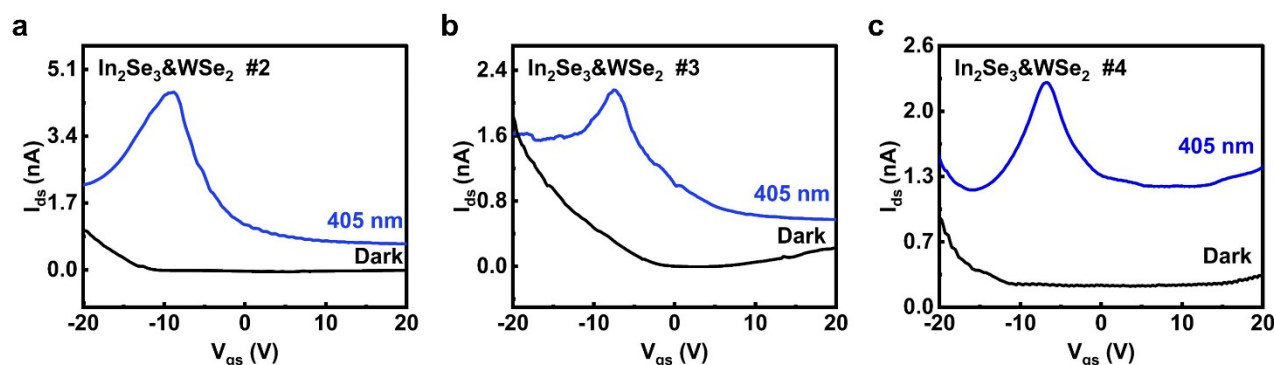

**Fig. S6** Transfer curves of other  $\text{In}_2\text{Se}_3$ & $\text{WSe}_2$  heterotransistor devices under the dark condition and 405 nm laser illumination ( $4.17 \text{ mW cm}^{-2}$ ) at  $V_{ds} = 1$  V.

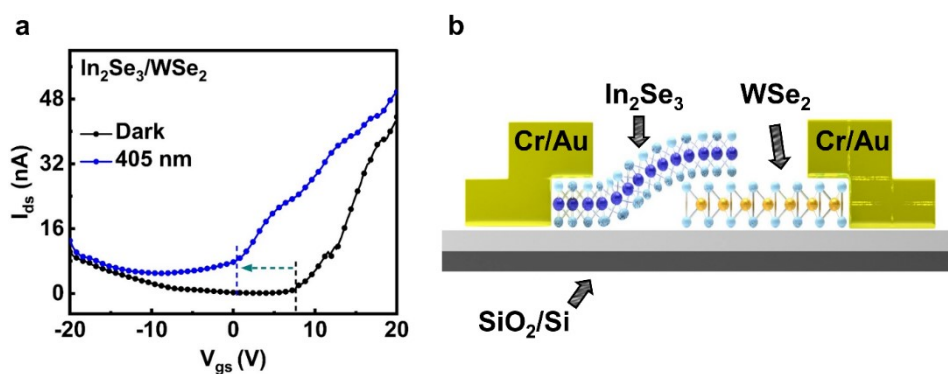

**Fig. S7** (a) Transfer characteristic of  $\text{In}_2\text{Se}_3/\text{WSe}_2$  device under the dark condition and 405 nm laser illumination ( $15.9 \text{ mW cm}^{-2}$ ) at  $V_{\text{ds}} = 3 \text{ V}$ . (b) Schematic structure of  $\text{In}_2\text{Se}_3/\text{WSe}_2$  device.

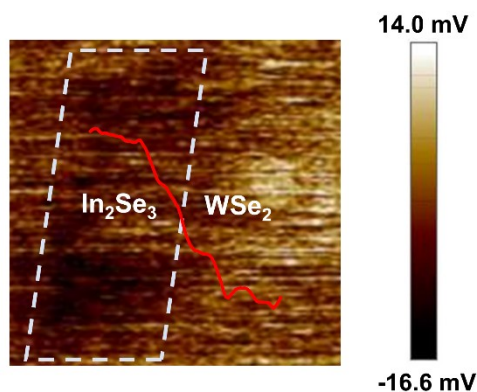

**Fig. S8** KPFM mapping images of  $\text{In}_2\text{Se}_3$  &  $\text{WSe}_2$  heterotransistors.

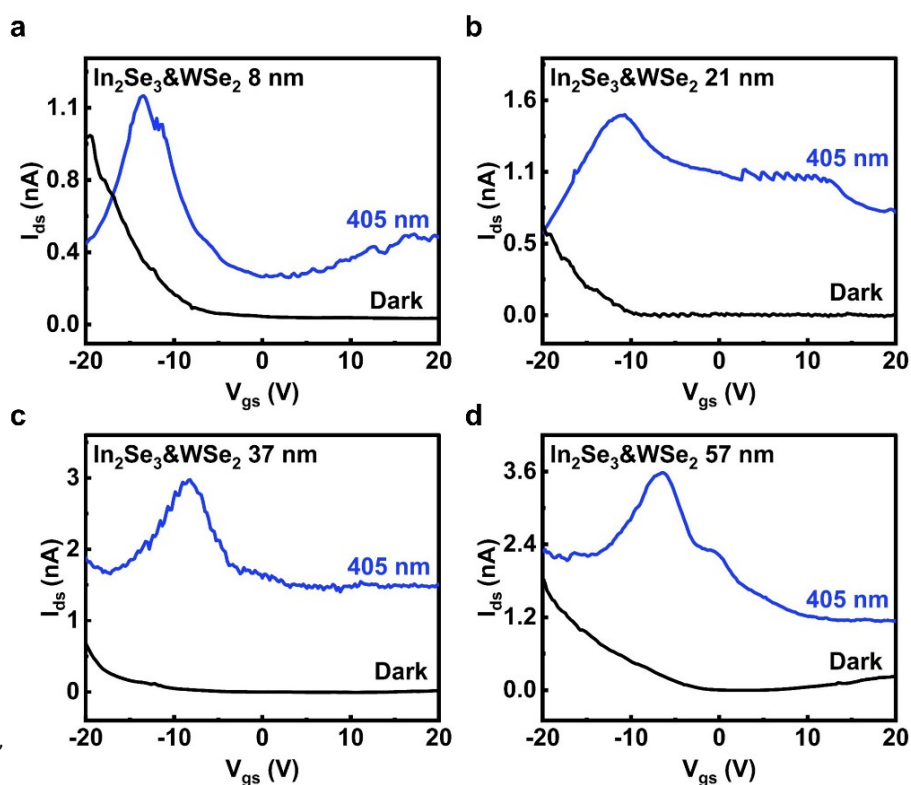

**Fig. S9** Transfer curves of  $\text{In}_2\text{Se}_3/\text{WSe}_2$  heterotransistors under the dark condition and 405 nm laser illumination ( $4.17 \text{ mW cm}^{-2}$ ) at  $V_{\text{ds}} = 1 \text{ V}$  in Fig. 5e-f.
